# Supplementary material for: Role of dissolved oxygen in metal(loid) removal by zerovalent iron at different pH: its dependence on the removal mechanisms
Source: Royal Society of Chemistry journal article supplement (doi:10.1039/c6ra08886d), 2016-01-01
Supplement: c6ra08886d1.pdf [file c6ra08886d1.pdf]

## Supplementary Materials for

# Role of Dissolved Oxygen in Metal(loid)s Removal by Zerovalent Iron at Different pH: Its Dependence on the Removal Mechanisms

Hejie Qin<sup>a,b</sup>, Jinxiang Li<sup>a</sup>, Qianqian Bao<sup>a</sup>, Lina Li,<sup>b</sup> Xiaohong Guan<sup>a,c</sup> \*

<sup>a</sup>State Key Laboratory of Pollution Control and Resources Reuse, College of Environmental Science and Engineering, Tongji University, Shanghai 200092, P. R. China

<sup>b</sup>Shanghai Synchrotron Radiation Facility, Shanghai Institute of Applied Physics, Chinese Academy of Sciences, Shanghai 201204, P. R. China

<sup>c</sup>Key Laboratory of Yangtze River Water Environment, Ministry of Education, College of Environment Science and Engineering, Tongji University, Shanghai 200092, China

\*Author to whom correspondence should be addressed

Xiaohong Guan, email: [guanxh@tongji.edu.cn](mailto:guanxh@tongji.edu.cn); phone: +86-21-65980956

Number of pages (including this page): 9

Number of Figures: 5

Number of Tables: 1

## Summary

**Figure S1.** Basic properties of pristine ZVI used in this study, including morphological appearances, particle size and mineral on the surface. (Page S3)

**Table S1.** Reactions and redox potentials for species involved in ZVI/H<sub>2</sub>O systems in this study. (Page S4)

**Figure S2.** Potential–pH diagrams for species in this study. (Page S5)

**Figure S3.** Schematic representation of the experimental setup used in this study. (Page S6)

**Figure S4.** Kinetics of Fe(II) accumulation in the ZVI/H<sub>2</sub>O systems without contaminant at pH 4.0 and 6.0. (Page S7)

**Figure S5.** Fractions of different Fe species in reacted ZVI samples collected at pH 6.0 (Page S8)

**Figure S6.** Concentration of total Fe in the ZVI/H<sub>2</sub>O systems with As(V) at pH 4.0 and 6.0. (Page S9)

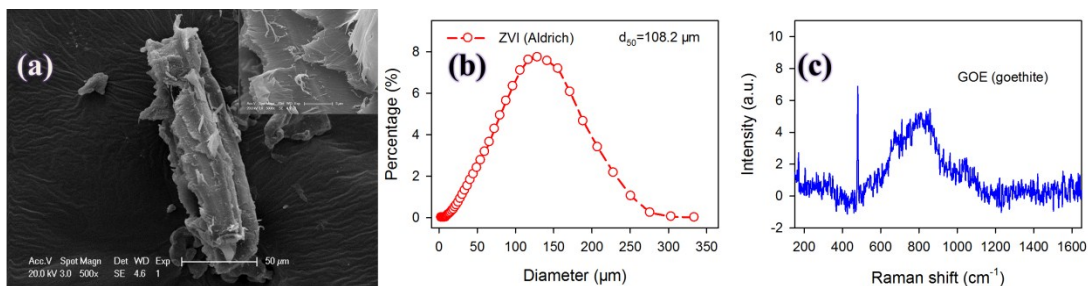

**Figure S1.** Basic properties of pristine ZVI used in this study, including morphological appearances, particle size and mineral on the surface. (a) The scanning electron microscopy image; (b) The particle size distribution; (c) The Raman spectra.

Morphological analysis was performed using a Hitachi 4700 microscope (at 15 kV). The size distribution of the Pri-ZVI particles was examined by Bettersize 2000 (Dandong Bettersize instruments Ltd., China). Raman spectra was collected using a DXR Raman Microscope (Thermo Fisher Scientific, Inc., China) with a 532 nm argon ion laser (2.0 mW), scanning from 100  $\text{cm}^{-1}$  to 1700  $\text{cm}^{-1}$  at room temperature. It should be noted that though the Raman spectroscopy identified FeOOH (goethite) in unreacted ZVI sample, it can be ignored for the very low quantity.

1 **Table S1.** Half reactions, the corresponding standard reduction potential, and conditional reduction potential for the redox species involved in  
 2 this study.

| Ox/Red                                  | Half reaction                                                                                                  | Standard reduction potential /V | Conditional reduction potential/V |        |
|-----------------------------------------|----------------------------------------------------------------------------------------------------------------|---------------------------------|-----------------------------------|--------|
|                                         |                                                                                                                |                                 | pH 4.0                            | pH 6.0 |
| Se(IV)/Se(0)                            | $\text{HSeO}_3^- + 5\text{H}^+ + 4\text{e}^- \rightarrow \text{Se} + 3\text{H}_2\text{O}$                      | 0.74                            | 0.444                             | 0.296  |
| Cr(VI)/Cr(III)                          | $\text{HCrO}_4^- + 7\text{H}^+ + 3\text{e}^- \rightarrow \text{Cr}^{3+} + 4\text{H}_2\text{O}$ (pH 4.0)        | 1.195                           | 0.879                             | 0.844  |
|                                         | $\text{HCrO}_4^- + 4\text{H}^+ + 3\text{e}^- \rightarrow \text{Cr}(\text{OH})_3 + \text{H}_2\text{O}$ (pH 6.0) |                                 |                                   |        |
| Cu(II)/Cu(0)                            | $\text{Cu}^{2+} + 2\text{e}^- \rightarrow \text{Cu}$                                                           | 0.34                            | 0.34                              | 0.34   |
| Pb(II)/Pb(0)                            | $\text{Pb}^{2+} + 2\text{e}^- \rightarrow \text{Pb}$                                                           | -0.127                          | -0.127                            | -0.127 |
| $\text{O}_2/\text{O}(-\text{II})$       | $\text{O}_2 + 4\text{H}^+ + 4\text{e}^- \rightarrow 2\text{H}_2\text{O}$                                       | 1.229                           | 0.993                             | 0.875  |
| Fe(III)/Fe(II)                          | $\text{Fe}^{3+} + \text{e}^- \rightarrow \text{Fe}^{2+}$                                                       | 0.769                           | 0.769                             | 0.769  |
| Fe(II)/Fe(0)                            | $\text{Fe}^{2+} + 2\text{e}^- \rightarrow \text{Fe}$                                                           | -0.44                           | -0.44                             | -0.44  |
| $\text{Fe}(\text{OH})_3/\text{Fe}^{2+}$ | $\text{Fe}(\text{OH})_3 + \text{e}^- \rightarrow \text{Fe}^{2+} + 3\text{OH}^-$                                | -1.51                           | 0.26                              | -0.1   |

3

4

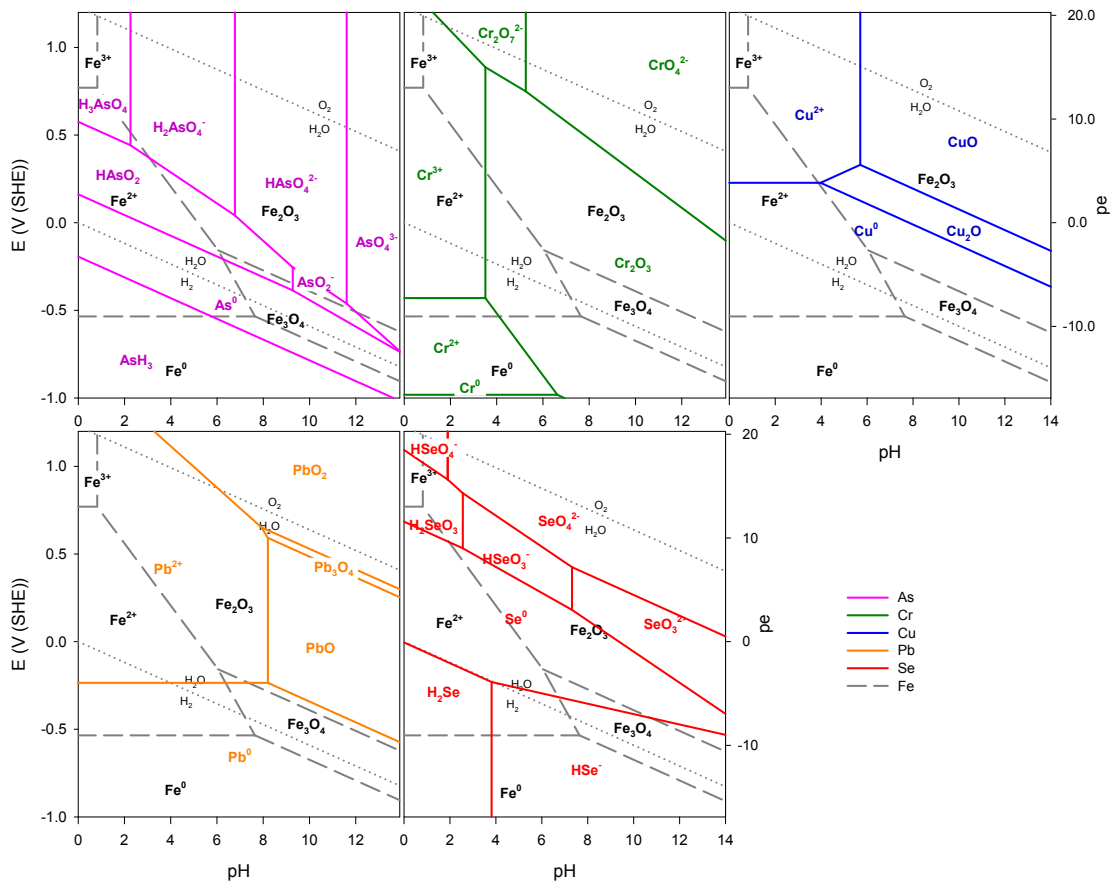

5

6 **Figure S2.** Eh–pH diagrams for species involved in this study (As(V) = 0.05 mM;  
 7 Cr(VI) = 0.05 mM; Cu(II) = 0.2 mM; Pb(II) = 0.2 mM; Se(IV) = 0.2 mM;  
 8 Temperature = 298 K; Suppressed iron phases: pyrite, pyrrhotite, and troilite.)

9

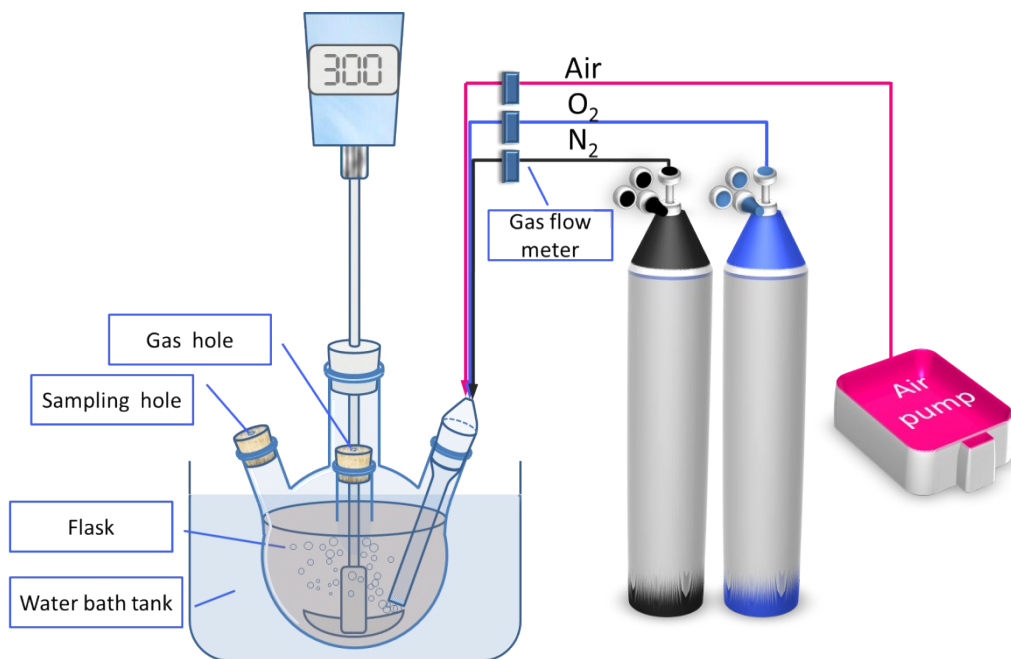

10

11 **Figure S3.** Schematic diagram of the experimental setup used in this study.

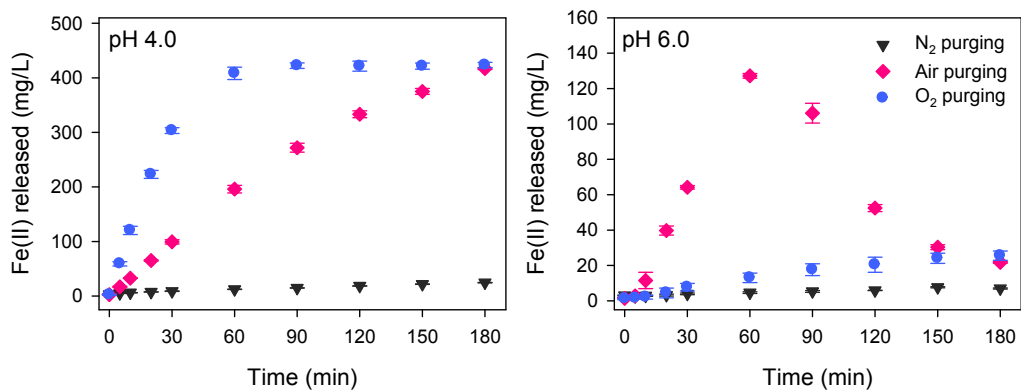

12

13 **Figure S4.** Kinetics of Fe(II) accumulation in the ZVI/H<sub>2</sub>O systems without  
 14 contaminant at pH 4.0 and 6.0. Reaction conditions: [Fe<sup>0</sup>]<sub>0</sub> = 0.5 g/L, [NaCl] = 0.01 M.

15

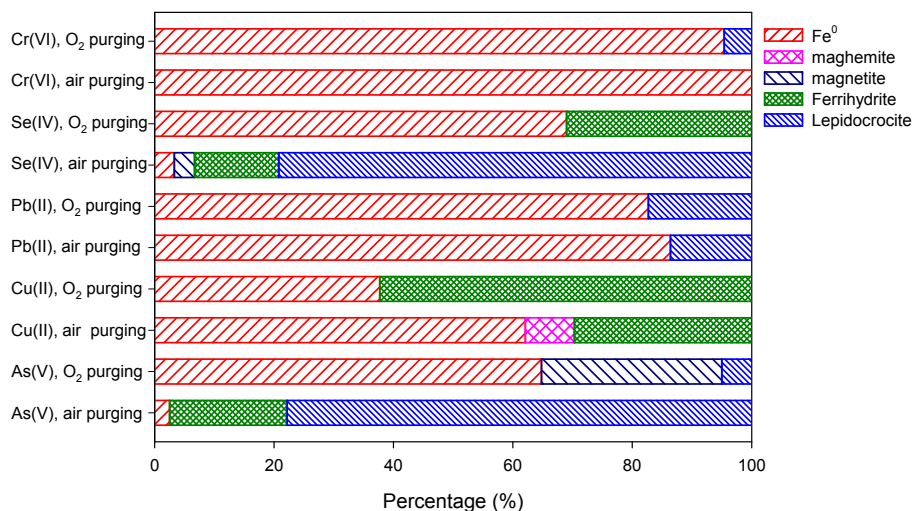

16

17 **Figure S5.** Fractions of different Fe species in reacted ZVI samples collected in the  
 18 process of removal by ZVI at pH 6.0, which were derived from the LCF of Fe *k*<sup>3</sup>-  
 19 weighted EXAFS spectra (reaction time: 3 h).

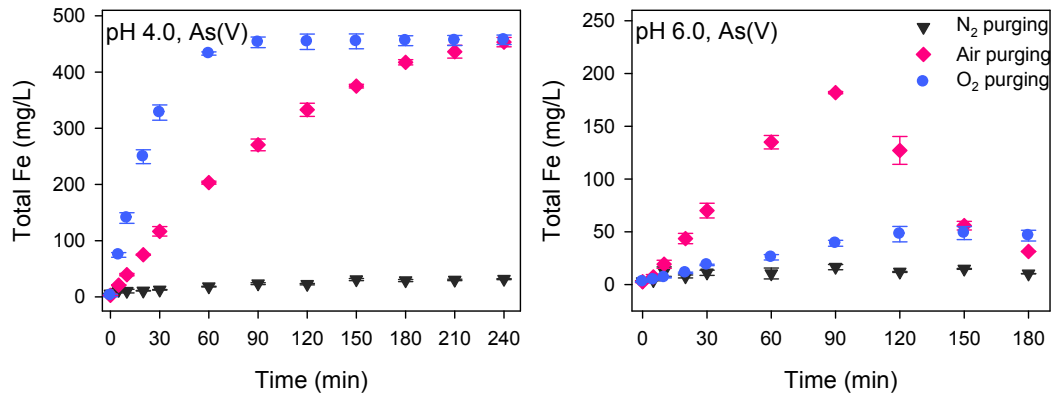

21

22 **Figure S6.** Concentration of total Fe in the ZVI/H<sub>2</sub>O systems with As(V) at pH 4.0

23 and 6.0 (controlled).
